# Supplementary material for: Influence of MMP12 single nucleotide polymorphism rs586701 on the prognosis of primary lung cancer patients：a multicenter prospective study
Source: Research Square preprint supplement (doi:10.21203/rs.3.rs-7840143/v1), 2025-12-02
Supplement: Supplementary file 1 [file 3aa9494ed562b763190f12c2.docx]

**Table 4：**Association between MMP12 polymorphism rs586701 in dominant genotype and prognosis of Chinese patients with lung cancer.

| Variables | Death/survive | | HR（95%Cl） | P | HRa（95%Cl） | Pa |
| --- | --- | --- | --- | --- | --- | --- |
| TT（ref） | TG+GG |  |  |  |  |
| Sex |  |  |  |  |  |  |
| Male | 366/85 | 136/23 | 1.15 (0.94-1.40) | 0.172 | 1.15 (0.94-1.40) | 0.171 |
| Female | 113/43 | 53/20 | 1.11 (0.80-1.54) | 0.525 | 1.07 (0.77-1.49) | 0.692 |
| Age |  |  |  |  |  |  |
| ≥60 | 317/62 | 120/25 | 0.96 (0.78-1.19) | 0.729 | 0.99 (0.80-1.23) | 0.938 |
| ＜60 | 162/66 | 65/14 | 1.60 (1.19-2.14) | 0.002 | 1.58 (1.18-2.12) | 0.002 |
| Smoking stage |  |  |  |  |  |  |
| Smoker | 355/76 | 132/19 | 1.21 (0.99-1.48) | 0.063 | 1.21 (0.99-1.49) | 0.059 |
| Nonsmoker | 116/46 | 53/22 | 1.00 (0.72-1.39) | 0.982 | 0.96 (0.69-1.34) | 0.813 |
| Family History |  |  |  |  |  |  |
| Yes | 174/43 | 73/12 | 1.18 (0.89-1.55) | 0.248 | 1.15 (0.87-1.53) | 0.314 |
| No | 305/85 | 116/31 | 1.09 (0.88-1.35) | 0.429 | 1.10 (0.88-1.36) | 0.409 |
| Subtype |  |  |  |  |  |  |
| ADC | 196/64 | 80/27 | 1.06 (0.81-1.37) | 0.678 | 1.05 (0.81-1.36) | 0.732 |
| SCC | 173/38 | 66/5 | 1.30 (0.98-1.73) | 0.074 | 1.31 (0.98-1.75) | 0.067 |
| NSCLC | 434/116 | 175/42 | 1.12 (0.94-1.33) | 0.222 | 1.13 (0.94-1.34) | 0.189 |
| TNM stage |  |  |  |  |  |  |
| StageⅠ+Ⅱ | 58/59 | 18/19 | 1.41 (0.67-2.95) | 0.367 | 1.48 (0.70-3.11) | 0.303 |
| Stage Ⅲ+Ⅳ | 377/62 | 163/23 | 1.04 (0.87-1.25) | 0.665 | 1.04 (0.87-1.26) | 0.647 |

*HR：hazard ratio；CI:* *confidence interval;* *ref:reference;a:* *Adjusted by age, sex.*
