# Supplementary material for: Influence of MMP12 single nucleotide polymorphism rs586701 on the prognosis of primary lung cancer patients：a multicenter prospective study
Source: Research Square preprint supplement (doi:10.21203/rs.3.rs-7840143/v1), 2025-12-02
Supplement: Supplementary file 2 [file 87b587542f30a0477f5db081.docx]

| Model | Death/survive | MST | HR（95% Cl）* | P | HRa（95%Cl） | Pa |
| --- | --- | --- | --- | --- | --- | --- |
| Allele |  |  |  |  |  |  |
| T（ref） | 1132/290 | 37.13 | 1 |  | 1 |  |
| G | 204/52 | 32.7 | 1.03 (0.89-1.20) | 0.698 | 1.03 (0.89-1.20) | 0.671 |
| Genotype |  |  |  |  |  |  |
| T/T(ref) | 479/128 | 38.5 | 1 |  | 1 |  |
| T/G | 174/34 | 29.53 | 1.21 (1.01-1.44) | 0.034 | 1.21 (1.01-1.44) | 0.035 |
| G/G | 15/9 | 67.33 | 0.60 (0.35-1.02) | 0.059 | 0.61 (0.36-1.04) | 0.067 |
| Dominate |  |  |  |  |  |  |
| T/T(ref) | 479/128 | 38.5 | 1 |  | 1 |  |
| T/G+G/G | 189/43 | 31.43 | 1.12 (0.95-1.33) | 0.181 | 1.12 (0.95-1.33) | 0.179 |
| Recessive |  |  |  |  |  |  |
| T/T+T/G(ref) | 653/162 | 36.03 | 1 |  | 1 |  |
| G/G | 15/9 | 67.33 | 0.57 (0.34-0.97) | 0.038 | 0.58 (0.34-0.99) | 0.045 |

**Table 2：**Association between *MMP12* gene polymorphism rs586701 and prognosis of Chinese lung cancer patients.

*HR：hazard ratio；CI:* *confidence interval;* *ref:reference;a:* *Adjusted by age, sex.*
