# Supplementary material for: Influence of MMP12 single nucleotide polymorphism rs586701 on the prognosis of primary lung cancer patients：a multicenter prospective study
Source: Research Square preprint supplement (doi:10.21203/rs.3.rs-7840143/v1), 2025-12-02
Supplement: Supplementary file 3 [file a64b1ed1a2e75bf4f3533ad0.docx]

**Table 1：**Characteristic distribution in Chinese patients with lung cancer and prognosis analysis.

| Variables | N（%） | MST# | P |
| --- | --- | --- | --- |
| Total | 839 | 36.73 |  |
| Sex |  |  | 0.01 |
| Female | 229（27.3%） | 40.17 |  |
| Male | 610（72.7%） | 34.27 |  |
| Age |  |  | 0.003 |
| <60 | 315（37.5%） | 40.87 |  |
| ≥60 | 524（62.5%） | 33.20 |  |
| Smoking stage |  |  |  |
| Nonsmoker | 237（28.2%） | 41.03 |  |
| Smoker | 582（69.4%） | 33.90 |  |
| Unknown | 20（2.4%） | 67 |  |
| Family History |  |  | 0.462 |
| Yes | 302（36%） | 33.63 |  |
| No | 537（64%） | 38.03 |  |
| Subtype |  |  | 0.211 |
| ADC | 367（43.7%） | 38.80 |  |
| SCC | 282（33.6%） | 33.63 |  |
| SCLC | 72（8.6%） | 33.90 |  |
| Others | 118（14.1%） | 36.20 |  |
| TNM stage |  |  | <0.001 |
| StageⅠ+Ⅱ | 154（18.4%） | 113.93 |  |
| StageⅢ+Ⅳ | 625（74.5%） | 29.4 |  |
| Unknown | 60（7.1%） | 66.43 |  |

*N: number; MST:* *median survival time.*
