# Supplementary material for: Influence of MMP12 single nucleotide polymorphism rs586701 on the prognosis of primary lung cancer patients：a multicenter prospective study
Source: Research Square preprint supplement (doi:10.21203/rs.3.rs-7840143/v1), 2025-12-02
Supplement: Supplementary file 4 [file df8404e9cdf4a61fc15235ee.docx]

**Table 3：**Association between *MMP12* polymorphism rs586701 in genotype models and prognosis of Chinese patients with lung cancer.

| Variables | Death/survive | | HR（95%Cl） | P | HRa（95%Cl） | Pa |
| --- | --- | --- | --- | --- | --- | --- |
| TT（ref） | TG |  |  |  |  |
| Sex |  |  |  |  |  |  |
| Male | 366/85 | 123/17 | 1.23 (1.01-1.52) | 0.044 | 1.24 (1.01-1.52) | 0.042 |
| Female | 113/43 | 51/17 | 1.20 (0.86-1.67) | 0.286 | 1.14 (0.81-1.60) | 0.445 |
| Age |  |  |  |  |  |  |
| ≥60 | 317/62 | 109/20 | 1.02 (0.82-1.26) | 0.885 | 1.05 (0.84-1.31) | 0.664 |
| ＜60 | 162/66 | 65/14 | 1.60 (1.19-2.14) | 0.002 | 1.58 (1.18-2.12) | 0.002 |
| Smoking stage |  |  |  |  |  |  |
| Smoker | 355/76 | 117/14 | 1.30 (1.05-1.60) | 0.015 | 1.30 (1.06-1.61) | 0.013 |
| Nonsmoker | 116/46 | 53/18 | 1.12 (0.81-1.55) | 0.512 | 1.07 (0.77-1.48) | 0.706 |
| Family History |  |  |  |  |  |  |
| Yes | 174/43 | 68/8 | 1.29 (0.97-1.70) | 0.078 | 1.27 (0.95-1.69) | 0.110 |
| No | 305/85 | 106/26 | 0.99 (0.71-1.39) | 0.955 | 0.99 (0.71-1.39) | 0.953 |
| Subtype |  |  |  |  |  |  |
| ADC | 196/64 | 74/23 | 1.10 (0.84-1.44) | 0.481 | 1.09 (0.83-1.42) | 0.551 |
| SCC | 173/38 | 59/3 | 1.46 (1.08-1.97) | 0.013 | 1.48 (1.10-2.01) | 0.011 |
| NSCLC | 434/116 | 160/33 | 1.20 (1.00-1.44) | 0.046 | 1.21 (1.01-1.46) | 0.038 |
| TNM stage |  |  |  |  |  |  |
| StageⅠ+Ⅱ | 58/59 | 18/15 | 1.41 (0.67-2.95) | 0.367 | 1.48 (0.70-3.11) | 0.303 |
| Stage Ⅲ+Ⅳ | 377/62 | 149/18 | 1.08 (0.77-1.51) | 0.662 | 1.04 (0.74-1.46) | 0.812 |

*HR：hazard ratio；CI:* *confidence interval;* *ref:reference;a:* *Adjusted by age, sex.*
